# Supplementary material for: Determination of ketoacids in drinking water by DNPH derivatization and LC-ESI-MS/MS
Source: Royal Society of Chemistry journal article supplement (doi:10.1039/c5ay01206f), 2015-01-01
Supplement: c5ay01206f1.pdf [file c5ay01206f1.pdf]

## **Supplementary Material**

for

### **Determination of ketoacids in drinking water by DNPH**

#### **derivatization and LC-ESI-MS/MS**

Yu-qin Mao <sup>a</sup>, Xiao-mao Wang <sup>a</sup>, Shun Tang <sup>a</sup>, Hong-wei Yang <sup>a,\*</sup>, Yuefeng F. Xie <sup>a,b</sup>

<sup>a</sup> State Key Joint Laboratory of Environmental Simulation and Pollution Control,  
School of Environment, Tsinghua University, Beijing 100084, China

<sup>b</sup> Environmental Engineering Programs, The Pennsylvania State University,  
Middleton, PA 17057, USA

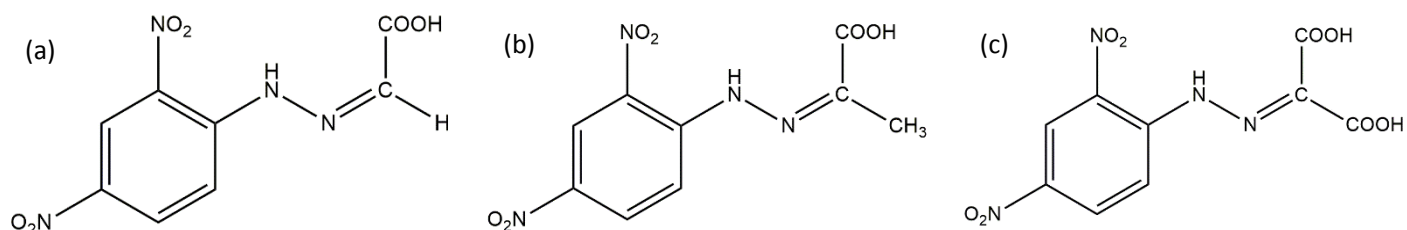

Fig. S1 Chemical structures of derivatized ketoacids: (a) glyoxylic acid, (b) pyruvic acid, (c): ketomalonic acid

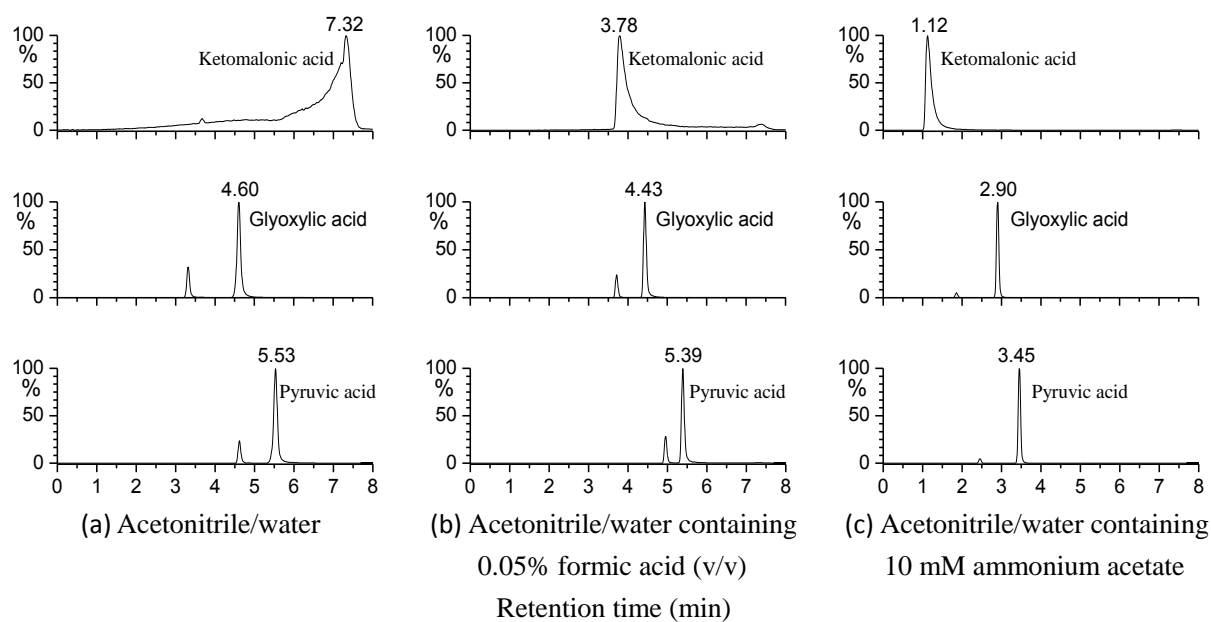

Fig. S2. Comparison of LC-MS/MS chromatograms of ketoacids (5 mL of the mixed standard solution of 100  $\mu\text{g/L}$ , pH 3.0, temperature  $40 \pm 1$   $^{\circ}\text{C}$ , derivatization time 1 h, molar ratio of DNPH to the total reaction groups at 150).

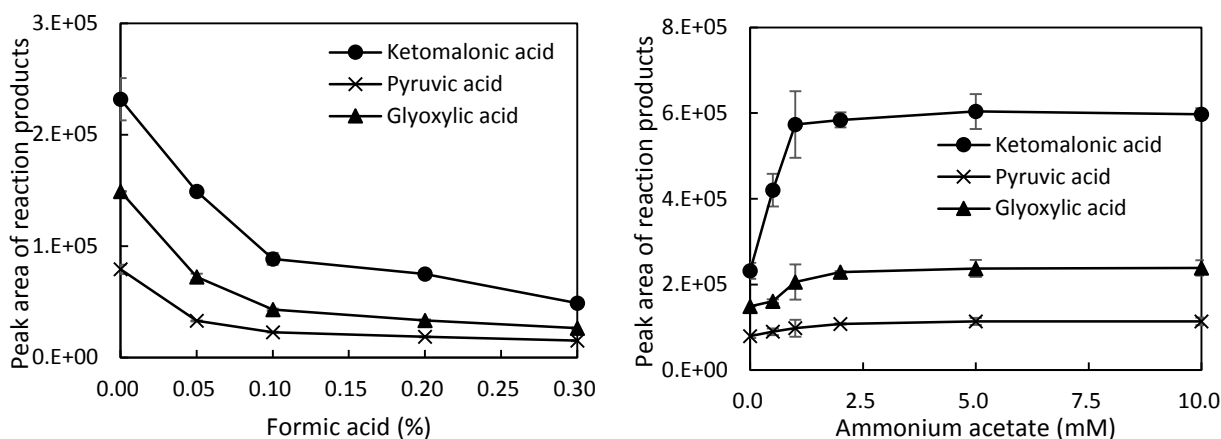

Fig. S3. Effects of mobile phase compositions on signal intensities (5 mL of the mixed standard solution of 100  $\mu\text{g/L}$ , pH 3.0, temperature  $40 \pm 1$   $^{\circ}\text{C}$ , derivatization time 1 h, molar ratio of DNPH to the total reaction groups at 150).

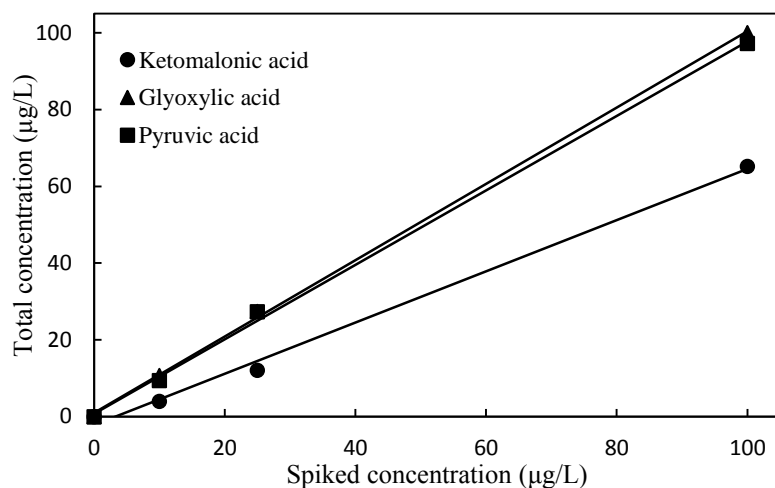

Fig. S4. Spiked recoveries of ketoacids from tap water (5 mL of tap water spiked with mixed standard solutions at 0, 5, 25, 100  $\mu\text{g/L}$ , pH 3.0, temperature  $40 \pm 1$   $^{\circ}\text{C}$ , derivatization time 1 h, molar ratio of DNPH to the total reaction groups at 150).

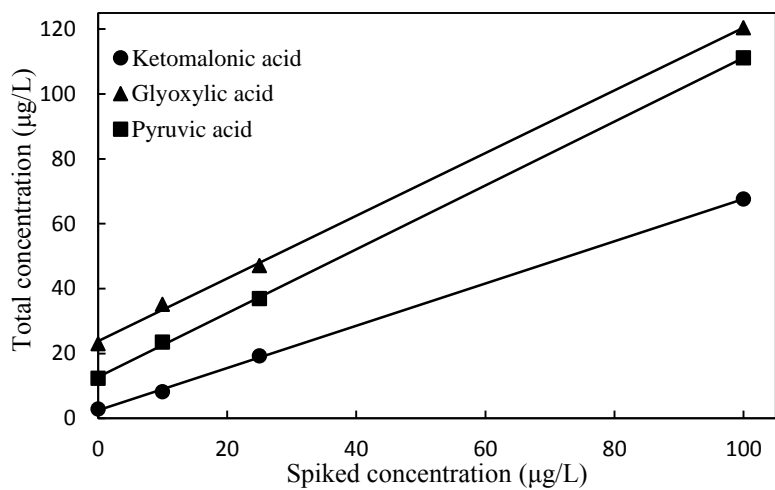

Fig. S5. Spiked recoveries of ketoacids from ozonated water (5 mL of ozonated water spiked with mixed standard solutions at 0, 5, 25, 100 µg/L, pH 3.0, temperature  $40 \pm 1$  °C, derivatization time 1 h, molar ratio of DNPH to the total reaction groups at 150).
